# Supplementary material for: Sexual Dimorphism in Extracellular Matrix Composition and Viscoelasticity of the Healthy and Inflamed Mouse Brain
Source: Preprints.org preprint supplement (doi:10.20944/preprints202112.0333.v1), 2021-12-21
Supplement: Supplementary file 1 [file supplementary]

Supplementary Materials

**Table S1:** Gene symbols and corresponding primers for TaqMan**®** assays.

| gene symbol | gene name | amplicon length | TaqMan® Assay ID |
| --- | --- | --- | --- |
| *Lama4* | laminin, alpha 4 | 81 | Mm01193660_m1 |
| *Lama5* | laminin, alpha 5 | 64 | Mm01222029_m1 |
| *Col1a1* | collagen, type I, alpha 1 | 89 | Mm00801666_g1 |
| *Col4a1* | collagen, type IV, alpha 1 | 74 | Mm01210125_m1 |
| *Fn1* | fibronectin 1 | 58 | Mm01256744_m1 |
| *Hprt* | hypoxanthine guanine phosphoribosyl transferase | 131 | Mm03024075_m1 |


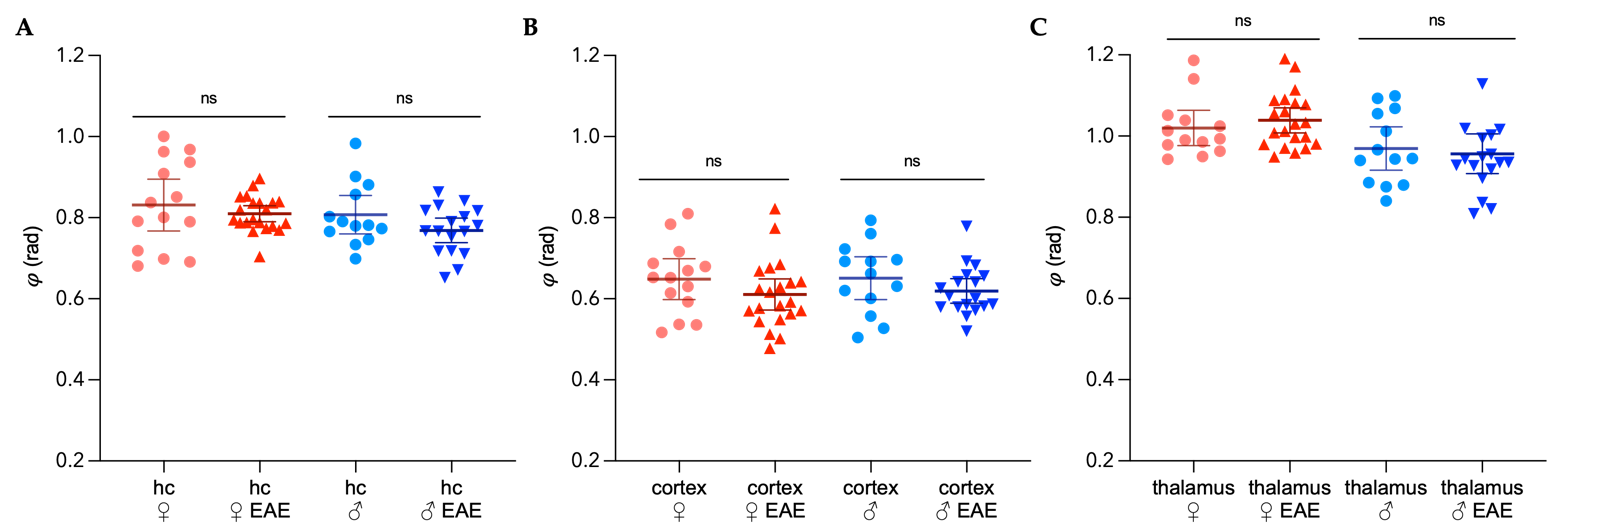


**Figure S1.** Regional distribution of sex-specific fluidity 𝜑 in the midbrain of the mouse in healthy and EAE. A) hippocampus (hc), B) cortex and C) thalamic area; light red = healthy female, dark red = EAE female, light blue = healthy male, dark blue = EAE male. Representation of individual data points with mean and 95%CI. *nfemale naive* = 14, *nmale naive* = 13, *nfemale EAE* = 21, *nmale EAE* = 18. Group comparison performed with unpaired *t* test with Welch correction.


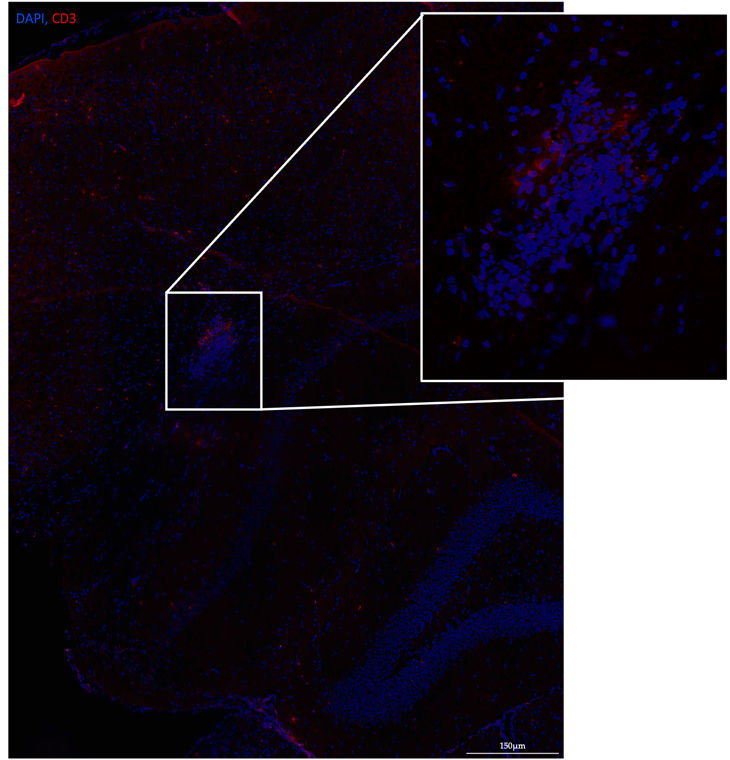


**Figure S2.** Singular cortical lesion in the midbrain in male EAE, adjacent to the hippocampus. CD3 (red) and DAPI (blue). Scale bar = 150µm.
